# Supplementary material for: Construction of Flower-like FeCo2O4 Nanosheets on Ni Foam as Efficient Electrocatalyst for Oxygen Evolution Reaction
Source: MDPI journal article supplement (doi:10.3390/coatings13111875), 2023-10-31
Supplement: s1 [file s1]

## Supporting Information

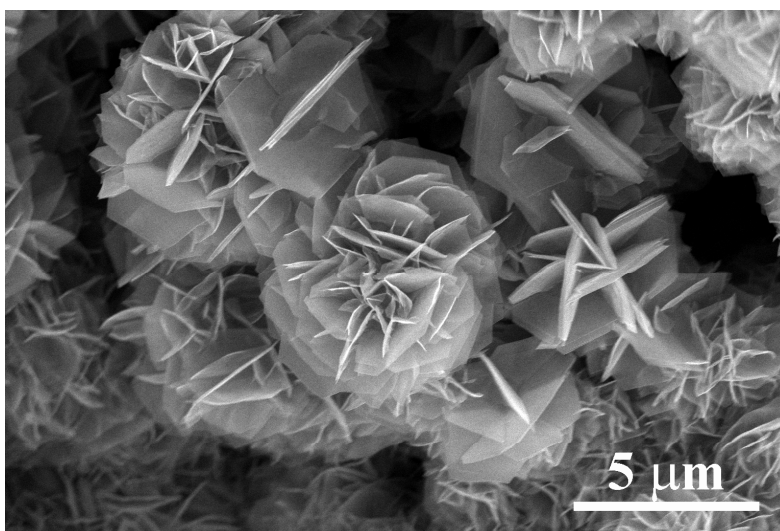

Figure S1. SEM of FeCo<sub>2</sub>O<sub>4</sub>/NF-120° C

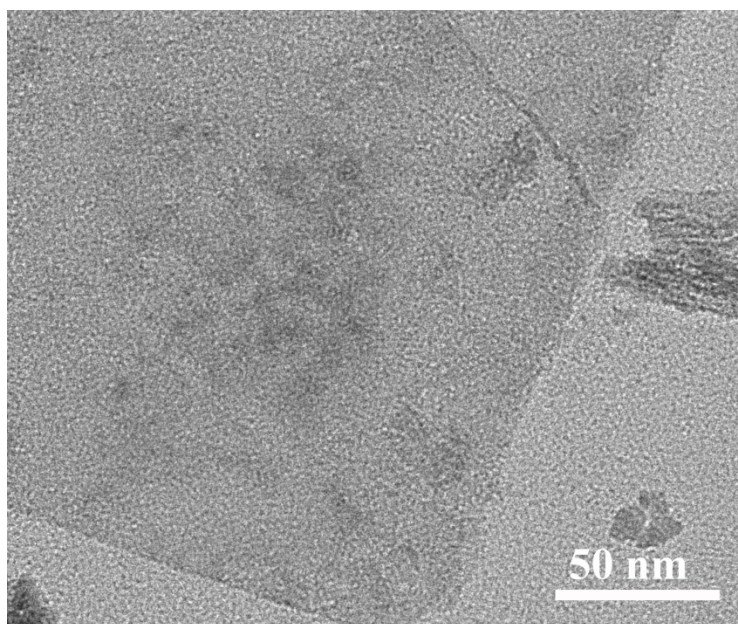

Figure S2.TEM of  $\text{FeCo}_2\text{O}_4/\text{NF}$ -120° C

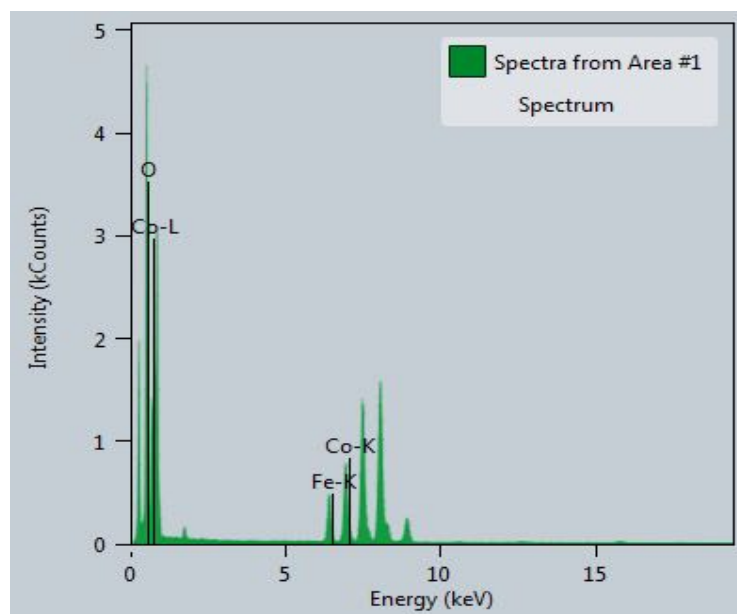

Figure S3. EDX of  $\text{FeCo}_2\text{O}_4/\text{NF}$ -120° C

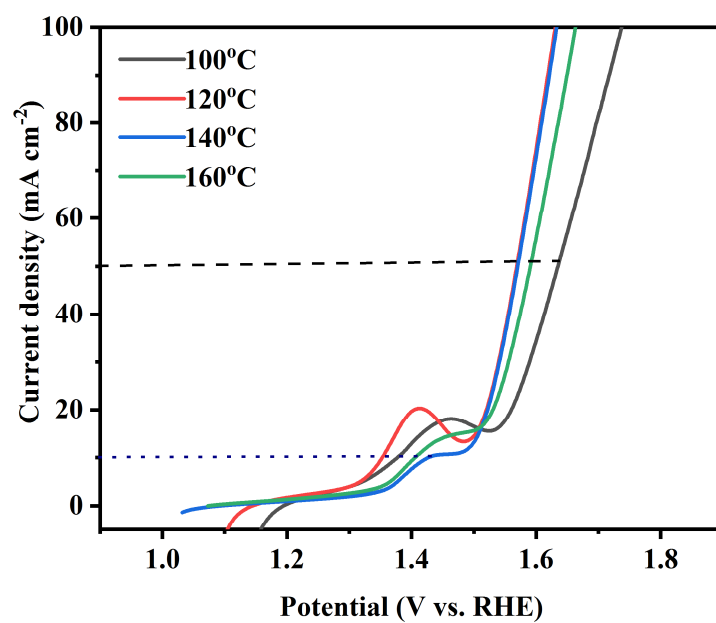

Figure S4. LSV of FeCo<sub>2</sub>O<sub>4</sub>/NF electrodes

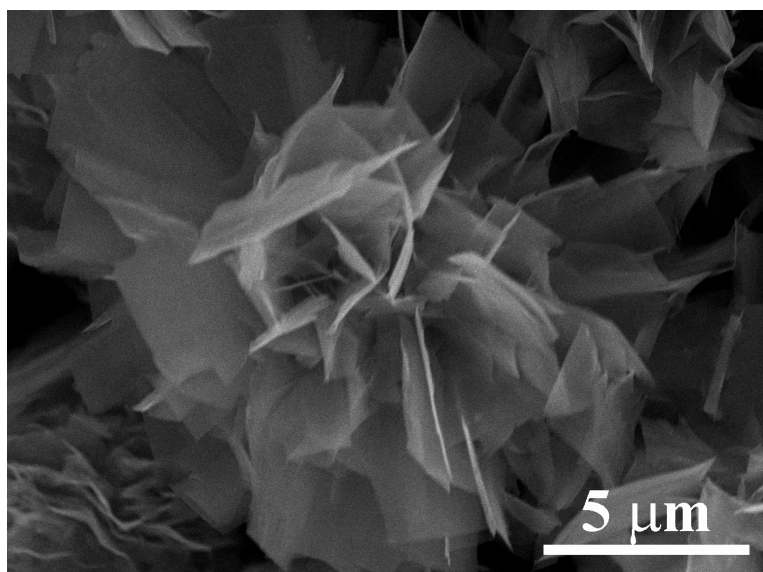

Figure S5. SEM of FeCo<sub>2</sub>O<sub>4</sub>/NF-120° C after stability test
